# Supplementary material
Source: PubMed Central journal article supplement (PMC5519376)
Supplement: 10.1074_M117.794834_jbc.M117.794834-3.pdf [file 10.1074_M117.794834_jbc.M117.794834-3.pdf]

**Table S1**

| hnRNPLL derivative | Amino acids encoded | Amino acid sequence   | Nucleotide sequence                           |
|--------------------|---------------------|-----------------------|-----------------------------------------------|
| FL(Full-length)    | 1-591               | MSS...SHL             | ATGTCCTCC...TCCCATTTA                         |
| $\Delta$ N         | 122-591             | SVS...SHL             | TCTGTTTCC...TCCCATTTA                         |
| $\Delta$ RRM1      | 1-121 + 206-591     | MSS...HKV + GNT...SHL | ATGTCCTCC...CATAAAGTT + GGAAATACC...TCCCATTTA |
| $\Delta$ RRM2      | 1-213 + 310-591     | MSS...PSG + KPY...SHL | ATGTCCTCC...CCATCAGGG + AAACCTTAT...TCCCATTTA |
| $\Delta$ Linker    | 1-309 + 385-591     | MSS...DYT + VVM...SHL | ATGTCCTCC...GACTACT + GTTGTAATG...TCCCATTTA   |
| $\Delta$ RRM3      | 1-384 + 456-591     | MSS...SGS + SKQ...SHL | ATGTCCTCC...TCTGGCTCC + TCTAAACAG...TCCCATTTA |
| $\Delta$ RRM4      | 1-500 + 586-591     | MSS...IQP + STSSHL    | ATGTCCTCC...ATCCAGCCA + TCTACATCATCCCATTTA    |

| PABPC1 derivative | Amino acids encoded | Amino acid sequence   | Nucleotide sequence                          |
|-------------------|---------------------|-----------------------|----------------------------------------------|
| FL(Full-length)   | 1-636               | MNP...PTV             | ATGAACCCC...CCAAGTGT                         |
| $\Delta$ RRM1     | 1-11+92-636         | MNP...PMA + SLR...PTV | ATGAACCCC...CCCATGGCC + TCACTTCGC...CCAAGTGT |
| $\Delta$ RRM2     | 1-96 + 173-636      | MNP...RKS + FKS...PTV | ATGAACCCC...CGCAAAGT + TTTAAGTCT...CCAAGTGT  |
| $\Delta$ RRM3     | 1-189 + 270-636     | MNP...AKE + VER...PTV | ATGAACCCC...GCAAAGAA + GTGGAACGG...CCAAGTGT  |
| $\Delta$ RRM4     | 1-292 + 371-636     | MNP...RYQ + KEE...PTV | ATGAACCCC...AGATACCAG + AAAGAAGAG...CCAAGTGT |
| $\Delta$ Linker   | 1-370 + 544-636     | MNP...AQR + PLT...PTV | ATGAACCCC...GCTCAGCGC + CCTTTGACT...CCAAGTGT |
| $\Delta$ MLE      | 1-543 + 615-636     | MNP...GQE + QAH...PTV | ATGAACCCC...GGTCAGGAA + CAAGCCAC...CCAAGTGT  |
