# Supplementary material
Source: PubMed Central journal article supplement (PMC5519376)
Supplement: 10.1074_M117.794834_jbc.M117.794834-4.pdf [file 10.1074_M117.794834_jbc.M117.794834-4.pdf]

**Table S2**

| qRT-PCR primers of target      | sequence                                                               |
|--------------------------------|------------------------------------------------------------------------|
| mouse GAPDH                    | Forward: CCTGGAGAAACCTGCCAAGTATG<br>Reverse: AGAGTGGGAGTTGCTGTTGAAGTC  |
| mouse PABPC1                   | Forward: GAATATGCCCGGTGCTATCCG<br>Reverse: ACTCGTGGAACCTGTGAGGAA       |
| mouse Igy2b                    | Forward: TGGATGAGTGGCAAGGAGTT<br>Reverse: TGGTGGCGGCAAGATGTATA         |
| mouse Igy2b CH3 F              | CCGCCACCAGCAGAGCAGTT                                                   |
| mouse Igy2b sec pA R           | TGCATGGATATGGGTGCCAGTGT                                                |
| mouse Igy2b M1 R               | TCCAGAGGCCGTCCAGCTCC                                                   |
| mouse 28S rRNA                 | Forward: aagcgttggattgttcacc<br>Reverse: tcctcagccaagcacataca          |
| mouse 18S rRNA                 | Forward: ctcaacacgggaaacctcac<br>Reverse: cgctccaccaactaagaacg         |
| mouse secretory Igy $\mu$      | Forward: TCTCCCTGATCATGTCTGACACAG<br>Reverse: ATACACAGAGCAACTGGACACCCA |
| mouse membrane-bound Igy $\mu$ | Forward: TCCGGAGAGACCTATACCTGTGTT<br>Reverse: TTCTCAAAGCCTTCCTCCTCAGCA |
| EGFP                           | Forward: gacgacggcaactacaagac<br>Reverse: ggcggatcttgaagttcacc         |
| mouse seclgy2b 3'UTR           | Forward: GCTCAGCACCCACAAAGC<br>Reverse: acatggtaccaGGCTTTGCT           |
| mouse memlgy2b 3'UTR           | Forward: CCATCCTACTGTGCAGCCTA<br>Reverse: CTCAGATCCCCTAGTGCTGG         |
