# Supplementary material
Source: PubMed Central journal article supplement (PMC5519376)

# Supplement Figures

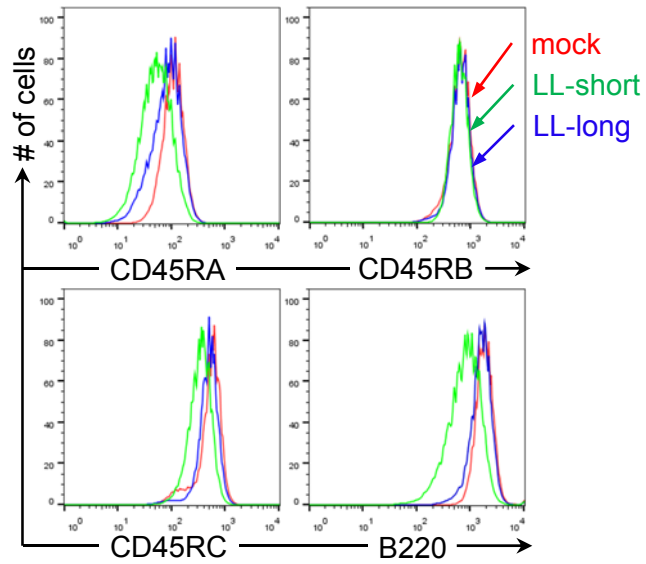

**Figure S1**

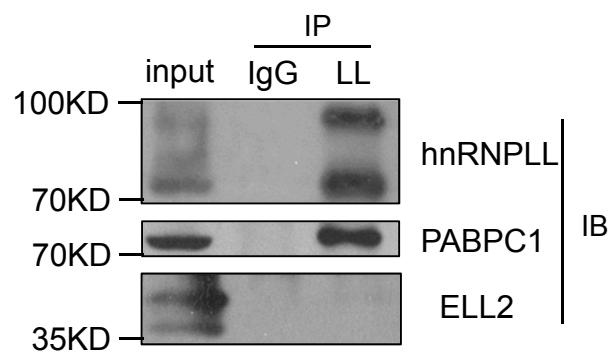

**Figure S2**

Supplement: 10.1074_M117.794834_jbc.M117.794834-1.pdf [file 10.1074_M117.794834_jbc.M117.794834-1.pdf]
